# Supplementary material
Source: publisher site journal article supplement (https://www.dovepress.com/article/325572)
Supplement: Supplementary file 1 [file get_supplementary_file.php]

**Supplementary File 1.** Education Day Presentation

A recording of the Education Day presentation is freely available on YouTube at the following link: https://www.youtube.com/watch?v=JDAC3ewBVVo.

**Supplementary File 2.** Pre-survey

**
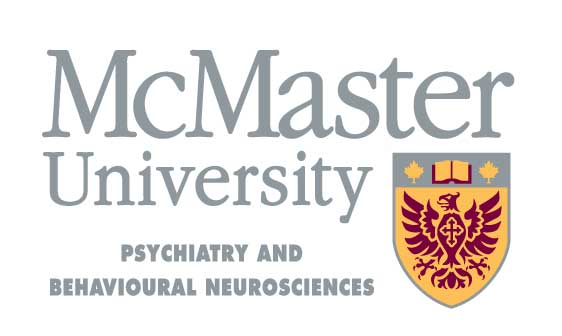
**

MAILING ADDRESS:

St. Joseph’s Healthcare Hamilton Bryce Bogie

Mood Disorders Research Unit, G137B P: 905-522-1155 x39543

100 West 5th St., Hamilton, ON L8N 3K7 E: bogiebj@mcmaster.ca

**COMPETENCE BY DESIGN SURVEY**

……………………………………………………………………………………………………………………………………………………………………………………………………………………………………

Instructions: **Date: November 21, 2018**

As an attendee at this year’s Education Day, the Department of Psychiatry and Behavioural Neurosciences’ Education Scholarship Committee invites you to complete this survey **BEFORE the start of today’s session**. The purpose of this survey is to assess learners’ and faculty’s perceptions of, and readiness for, the implementation of Competence By Design in our psychiatry program. The results from this survey will help inform the effectiveness of today’s event and will be disseminated in a scholarly way. Your participation in this survey is voluntary and all collected data will remain completely anonymous.

By submitting both the pre- and post-survey, you will be entered into a draw for a $100 Visa gift card.

**Please indicate your current profession/role (check all that apply):**

- Psychologist
- Psychiatrist
- Clinical Supervisor (supervision in a clinical environment)
- Medical Teacher (in-classroom medical teaching)
- Resident (indicate level of training): __________________
- Medical Student (indicate level of education): __________________
- Other: ______________________________

**How many years of experience do you have in your current professional role(s)?**

__________________________________________

**How would you rate your overall knowledge of Competency-Based Medical Education (CBME)?** CBME is defined as an outcomes-based approach to the design, implementation, assessment, and evaluation of a medical education program using an organizing framework of competencies.

| 1 | 2 | 3 | 4 | 5 | 6 | 7 |
| --- | --- | --- | --- | --- | --- | --- |
| Weak |  |  | Moderate |  |  | Strong |

**How would you rate your overall knowledge of the Competence By Design (CBD) framework?** CBD is the Royal College’s initiative designed to implement CBME into Canadian residency and specialty training programs.

| 1 | 2 | 3 | 4 | 5 | 6 | 7 |
| --- | --- | --- | --- | --- | --- | --- |
| Weak |  |  | Moderate |  |  | Strong |

**How would you rate your overall knowledge of the concepts of Entrustable Professional Activities (EPAs) and Milestones.** EPAs are defined as key tasks of a specialty that an individual can be trusted to perform in a given health care context. Milestones are observable markers of an individual’s ability.

| 1 | 2 | 3 | 4 | 5 | 6 | 7 |
| --- | --- | --- | --- | --- | --- | --- |
| Weak |  |  | Moderate |  |  | Strong |

**How prepared are you for the 2020 transition to Competence By Design in our psychiatry program?**

| 1 | 2 | 3 | 4 | 5 | 6 | 7 |
| --- | --- | --- | --- | --- | --- | --- |
| Not At All |  |  | Somewhat |  |  | Very |

**How much training and/or education do you feel you need to develop your skills as a clinician/educator/learner within the Competence By Design framework?**

| O None | O A little | O A moderate amount | O A lot |
| --- | --- | --- | --- |

**What format would best suit your educational needs in developing your skills within the Competence By Design framework (select all that apply)?**

- An annual full-day retreat
- Several educational sessions or workshops
- The distribution of relevant material by the department
- Online training/educational modules
- Other: .

**Are you confident that the shift to the Competence By Design framework will improve the educational/training experience of our psychiatry residents?**

| 1 | 2 | 3 | 4 | 5 | 6 | 7 | Do not know |
| --- | --- | --- | --- | --- | --- | --- | --- |
| Not At All |  |  | Somewhat |  |  | Very |  |

**Are you confident that the shift to the Competence By Design framework will improve faculty development among our department’s clinicians and educators?**

| 1 | 2 | 3 | 4 | 5 | 6 | 7 | Do not know |
| --- | --- | --- | --- | --- | --- | --- | --- |
| Not At All |  |  | Somewhat |  |  | Very |  |

**Which of the following do you think will be the greatest benefit associated with psychiatry’s transition to Competence By Design?**

- The ability to provide meaningful feedback to learners
- Being able to document learners’ progression using entrustable professional activities and milestones
- Helping learners identify their own educational needs
- Promoting and fostering discussion and self-reflection
- Improving patient outcomes
- Other: .

**Which of the following do you think will be the greatest challenge or barrier associated with psychiatry’s transition to Competence By Design?**

- Demands on time
- The clinical environment does not readily lend itself toward observation
- Lack of clear objectives and expectations
- Anticipated increase in the frequency of evaluation
- Clinical settings are too busy
- Lack of understanding of Competency-Based Medical Education and/or Competence By Design
- Lack of training and/or support
- Other: .

**Please rate your knowledge of each of the existing CanMEDS framework roles (i.e., in terms of each role’s definition and expectations) by shading in the appropriate circle.**

|  | 1 | 2 | 3 | 4 | 5 |
| --- | --- | --- | --- | --- | --- |
|  | Poor |  | Average |  | Strong |
| Medical Expert |  |  |  |  |  |
| Professional |  |  |  |  |  |
| Communicator |  |  |  |  |  |
| Scholar |  |  |  |  |  |
| Health Advocate |  |  |  |  |  |
| Collaborator |  |  |  |  |  |
| Manager/Leader |  |  |  |  |  |

**Which of the CanMEDS roles do you perceive as the most challenging to assess?**

Rank from 1 – Least Challenging to 7 – Most Challenging to Assess

|  | Rank |
| --- | --- |
| Medical Expert |  |
| Professional |  |
| Communicator |  |
| Scholar |  |
| Health Advocate |  |
| Collaborator |  |
| Manager/Leader |  |

**Have you accessed any of the Royal College of Physicians and Surgeons of Canada’s resources on Competence By Design (i.e., documents and/or presentations on CBD rationale, implementation, accreditation etc.)?**

- Yes
- No

**If yes, how helpful did you find these resources?**

| 1 | 2 | 3 | 4 | 5 | 6 | 7 |
| --- | --- | --- | --- | --- | --- | --- |
| Not At All |  |  | Somewhat |  |  | Very |

**Identify at least one way that the department can help you transition towards CBD practices (select all that apply).**

- Provide more information about Competency-Based Medical Education and/or Competence By Design
- Provide training for faculty
- Share educational responsibilities; for example, having senior residents help observe and teach junior residents
- Ensure that assessment and feedback tools are succinct and easy-to-use
- Other: .

**Supplementary File 3.** Post-survey

**
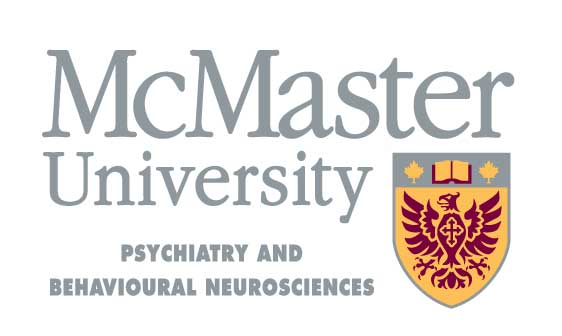
**

MAILING ADDRESS:

St. Joseph’s Healthcare Hamilton Bryce Bogie

Mood Disorders Research Unit, G137B P: 905-522-1155 x39543

100 West 5th St., Hamilton, ON L8N 3K7 E: bogiebj@mcmaster.ca

**COMPETENCE BY DESIGN SURVEY**

……………………………………………………………………………………………………………………………………………………………………………………………………………………………………

Instructions: **Date: November 21, 2018**

As an attendee at this year’s Education Day, the Department of Psychiatry and Behavioural Neurosciences’ Education Scholarship Committee invites you to complete this survey **at the END of today’s session**. The purpose of this survey is to assess learners’ and faculty’s perceptions of, and readiness for, the implementation of Competence By Design in our psychiatry program. The results from this survey will help inform the effectiveness of today’s event and will be disseminated in a scholarly way. Your participation in this survey is voluntary and all collected data will remain completely anonymous.

By submitting both the pre- and post-survey, you will be entered into a draw for a $100 Visa gift card.

**How would you rate your overall knowledge of Competency-Based Medical Education (CBME)?** CBME is defined as an outcomes-based approach to the design, implementation, assessment, and evaluation of a medical education program using an organizing framework of competencies.

| 1 | 2 | 3 | 4 | 5 | 6 | 7 |
| --- | --- | --- | --- | --- | --- | --- |
| Weak |  |  | Moderate |  |  | Strong |

**How would you rate your overall knowledge of the Competence By Design (CBD) framework?** CBD is the Royal College’s initiative designed to implement CBME into Canadian residency and specialty training programs.

| 1 | 2 | 3 | 4 | 5 | 6 | 7 |
| --- | --- | --- | --- | --- | --- | --- |
| Weak |  |  | Moderate |  |  | Strong |

**How would you rate your overall knowledge of the concepts of Entrustable Professional Activities (EPAs) and Milestones.** EPAs are defined as key tasks of a specialty that an individual can be trusted to perform in a given health care context. Milestones are observable markers of an individual’s ability.

| 1 | 2 | 3 | 4 | 5 | 6 | 7 |
| --- | --- | --- | --- | --- | --- | --- |
| Weak |  |  | Moderate |  |  | Strong |

**How prepared are you for the 2020 transition to Competence By Design in our psychiatry program?**

| 1 | 2 | 3 | 4 | 5 |  |  |
| --- | --- | --- | --- | --- | --- | --- |
| Not At All |  |  | Somewhat |  |  | Very |

**How much training and/or education do you feel you need to develop your skills as a clinician/educator/learner within the Competence By Design framework?**

| O None | O A little | O A moderate amount | O A lot |
| --- | --- | --- | --- |

**What format would best suit your educational needs in developing your skills within the Competence By Design framework (select all that apply)?**

- An annual full-day retreat
- Several educational sessions or workshops
- The distribution of relevant material by the department
- Online training/educational modules
- Other: .

**Are you confident that the shift to the Competence By Design framework will improve the educational/training experiences of our psychiatry residents?**

| 1 | 2 | 3 | 4 | 5 | 6 | 7 |
| --- | --- | --- | --- | --- | --- | --- |
| Not At All |  |  | Somewhat |  |  | Very |

**Are you confident that the shift to the Competence By Design framework will improve faculty development among our department’s clinicians and educators?**

| 1 | 2 | 3 | 4 | 5 | 6 | 7 |
| --- | --- | --- | --- | --- | --- | --- |
| Not At All |  |  | Somewhat |  |  | Very |

**Which of the following do you think will be the greatest benefit associated with psychiatry’s transition to Competence By Design?**

- The ability to provide meaningful feedback to learners
- Being able to document learners’ progression using entrustable professional activities and milestones
- Helping learners identify their own educational needs
- Promoting and fostering discussion and self-reflection
- Improving patient outcomes
- Other: .

**Which of the following do you think will be the greatest challenge or barrier associated with psychiatry’s transition to Competence By Design?**

- Demands on time
- The clinical environment does not readily lend itself toward observation
- Lack of clear objectives and expectations
- Anticipated increase in the frequency of evaluation
- Clinical settings are too busy
- Lack of understanding of Competency-Based Medical Education and/or Competence By Design
- Lack of training and/or support
- Other: .

**Identify at least one way that the department can help you transition towards Competence By Design practices (select all that apply).**

- Provide more information about Competency-Based Medical Education and/or Competence By Design
- Provide training for faculty
- Share educational responsibilities; for example, having senior residents help observe and teach junior residents
- Ensure that assessment and feedback tools are succinct and easy-to-use
- Other: .

**How would you rate the overall effectiveness of Education Day in improving your knowledge of Competence By Design?**

| 1 | 2 | 3 | 4 | 5 | 6 | 7 |
| --- | --- | --- | --- | --- | --- | --- |
| Not At All |  |  | Somewhat |  |  | Very |

**Do you have any suggestions for improvement?**

**THANK YOU FOR YOUR PARTICIPATION**

**Supplementary File 4.** Qualitative Data from the Open-Ended Question Provided on the Post-survey

Participants’ direct responses to the post-survey question, “Do you have any suggestions for improvement?”, are provided below. Responses are organized by group (faculty, learners).

**Faculty**

- Include actual examples—day-by-day/week-by-week/month-by-month—on how this CBME approach would look, or, if not, a timeline-based then skills-based approach (e.g., resident enters 1st week of clinic - what happens then; i.e., practically what does it typically look like).
- Provide handouts/online resources that can be accessed after education day.
- Provide executive summary of … slides.
- Please provide context (e.g., "evidence", tangible real examples) when administering CBD-related training.
- Not particularly helpful in improving knowledge of CBD; too general, not specific enough to be helpful… perhaps like CBD itself?
- Please consider the financial impact on students for taking longer. Most banks granting student loans will not extend time for repayment and student loans are enormous compared to residency incomes. I'm concerned this initiative will be financially ruinous to slower learners and increase young physician suicides. Student loans cannot be bankrupted.
- 1) Augment with experiences of those in the room (ask for personal examples); 2) have an info material takeaway document.
- I would have ranked Q12 higher, but my incoming knowledge was pretty high.
- Very well-done presentation.

**Learners**

- Was helpful in understanding the criticism of CBME. Would be useful to have a “base knowledge” of the principle’s concepts and tools of CMBE, and what it is and how it is different from our current model.
- More examples of what expectations will look like; more examples of the milestones; an explanation of how the residency would conclude for someone who meets all their milestones early.
- Very thought-provoking.
- Would be helpful to include a short introduction to the principles of CBD.
- Instead of beginning with the flaws of the education system, begin by talking about the concept of CBME and how specifically it will be implemented. Then I can understand the rationale for it when you explain the flaws of the system. I really love the humor that was integrated into the talk.
- More information: how will it be implemented and in psychiatry specifically.
- Some information about CBD would be helpful along with evidence and arguments for why it will be beneficial (although I could only attend rounds today).
